# Supplementary material
Source: ML conference proceedings conference paper supplement (https://openaccess.thecvf.com/content/CVPR2023/html/Wang_Privacy-Preserving_Adversarial_Facial_CVPR_2023_paper.html)
Supplement: Supplementary file 1 [file Wang_Privacy-Preserving_Adversarial_Facial_CVPR_2023_supplemental.pdf]

# Supplementary Material: Privacy-preserving Adversarial Facial Features

## Abstract

In this supplementary file, more qualitative and quantitative comparisons are provided to demonstrate the effectiveness of the proposed AdvFace. Following the experimental evaluation in the main submission, more corresponding examples in defense against privacy attacks, and transferability of AdvFace are visualized, respectively. Meanwhile, quantitative values are provided to further demonstrate the outstanding trade-off of our method between defending against reconstruction attacks and maintaining face recognition accuracy.

## A. Defense against Privacy Attacks

Figs. 1 2 3 show more reconstructed images from facial features protected by different methods on datasets LFW [1], CFP-FP [3], and AgeDB-30 [2], respectively. As shown in the third column, the reconstructed images from the adversarial features generated by the proposed AdvFace are hard to distinguish, while those protected by other methods (columns 4-6) undergo much information leakage about the original images.

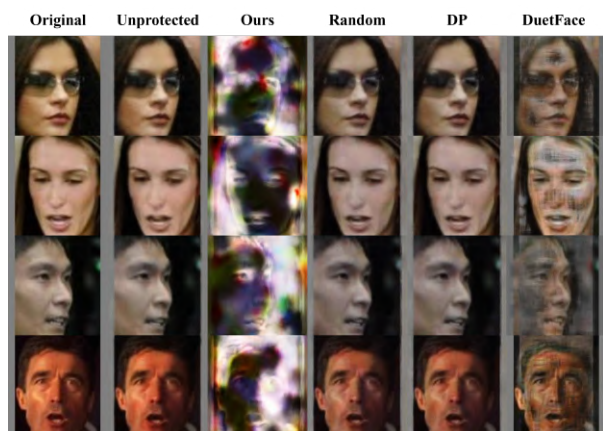

Figure 1. Reconstructed images from facial features generated by different privacy protection methods on dataset LFW.

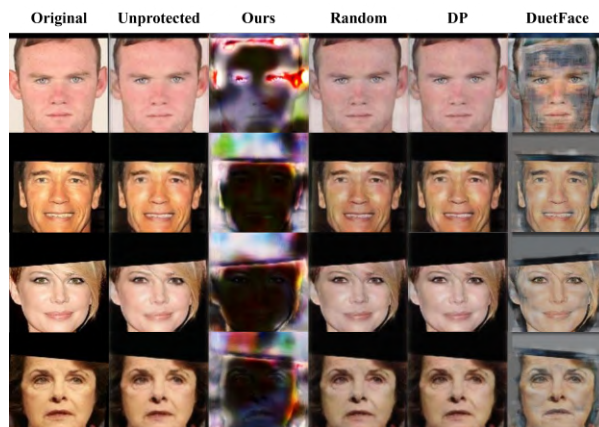

Figure 2. Reconstructed images from facial features generated by different privacy protection methods on dataset CFP-FP.

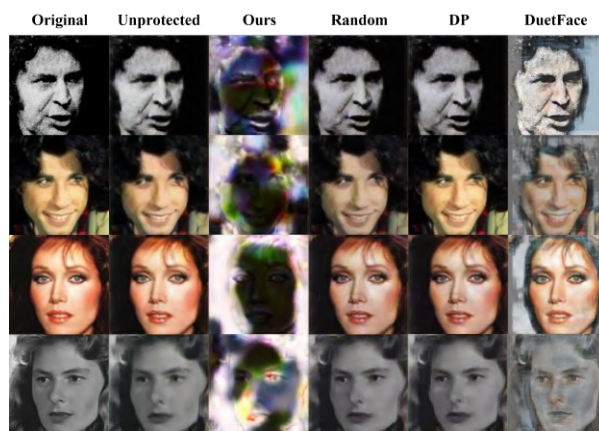

Figure 3. Reconstructed images from facial features generated by different privacy protection methods on dataset AgeDB-30.

Table 1. Quantitative values of trade-off among SSIM, PSNR, MSE, and ACC for AdvFace with different noise bounds.

| $\epsilon$ | LFW   |       |       |        | CFP-FP |       |       |        | AgeDB-30 |       |       |        |
|------------|-------|-------|-------|--------|--------|-------|-------|--------|----------|-------|-------|--------|
|            | SSIM↓ | PSNR↓ | MSE↑  | ACC↑   | SSIM↓  | PSNR↓ | MSE↑  | ACC↑   | SSIM↓    | PSNR↓ | MSE↑  | ACC↑   |
| 0.00       | 0.90  | 26.33 | 0.002 | 97.80% | 0.77   | 21.76 | 0.008 | 92.10% | 0.83     | 22.56 | 0.006 | 86.78% |
| 0.05       | 0.70  | 13.63 | 0.045 | 97.63% | 0.59   | 14.47 | 0.038 | 91.90% | 0.65     | 12.92 | 0.053 | 86.87% |
| 0.10       | 0.50  | 10.30 | 0.096 | 97.47% | 0.41   | 10.49 | 0.093 | 91.59% | 0.44     | 9.13  | 0.127 | 86.22% |
| 0.15       | 0.38  | 8.57  | 0.143 | 97.12% | 0.31   | 7.88  | 0.168 | 91.24% | 0.33     | 7.28  | 0.193 | 85.85% |
| 0.20       | 0.28  | 6.98  | 0.206 | 96.43% | 0.23   | 5.96  | 0.262 | 90.71% | 0.24     | 5.85  | 0.269 | 85.10% |
| 0.25       | 0.24  | 6.16  | 0.249 | 95.57% | 0.19   | 4.97  | 0.328 | 89.81% | 0.22     | 5.33  | 0.305 | 84.35% |
| 0.30       | 0.22  | 5.71  | 0.275 | 93.55% | 0.16   | 4.39  | 0.375 | 87.82% | 0.20     | 4.91  | 0.334 | 82.42% |

Table 2. The architecture of reconstruction networks.

|          |                                                                                                                                                                                                                                                                                                                                                                                                                                                                                                                                                                               |
|----------|-------------------------------------------------------------------------------------------------------------------------------------------------------------------------------------------------------------------------------------------------------------------------------------------------------------------------------------------------------------------------------------------------------------------------------------------------------------------------------------------------------------------------------------------------------------------------------|
| TransRec | $77^2 \times 64 \xrightarrow{\text{transconv3-64}} 70^2 \times 64 \xrightarrow{\text{transconv3-32}} 79^2 \times 32 \xrightarrow{\text{upsample}} 160^2 \times 32 \xrightarrow{\text{transconv3-32}} 160^2 \times 32 \xrightarrow{\text{transconv3-3}} 160^2 \times 3 \xrightarrow{\text{Sigmoid}}$                                                                                                                                                                                                                                                                           |
| ResRec   | $77^2 \times 64 \xrightarrow{\text{transconv3-64}} 77^2 \times 64 \xrightarrow{\text{IRBlock(64,2)}} 77^2 \times 64 \xrightarrow{\text{upsample}} 120^2 \times 64 \xrightarrow{\text{IRBlock(64,2)}} 120^2 \times 64 \xrightarrow{\text{upsample}} 160^2 \times 64 \xrightarrow{\text{conv1-3}} 160^2 \times 3 \xrightarrow{\text{Sigmoid}}$                                                                                                                                                                                                                                  |
| URec     | $77^2 \times 64 \xrightarrow{\text{conv3-64}} 77^2 \times 64 \xrightarrow{\text{conv3-64}} 77^2 \times 64 \xrightarrow{\text{conv3-64}} 77^2 \times 64 \xrightarrow{\text{upsample}} 120^2 \times 64 \xrightarrow{\text{conv3-128}} 120^2 \times 128 \xrightarrow{\text{conv3-128}} 120^2 \times 128 \xrightarrow{\text{conv3-128}} 120^2 \times 128 \xrightarrow{\text{upsample}} 160^2 \times 128 \xrightarrow{\text{conv3-256}} 160^2 \times 256 \xrightarrow{\text{conv3-256}} 160^2 \times 256 \xrightarrow{\text{conv3-3}} 160^2 \times 3 \xrightarrow{\text{conv1-3}}$ |

## B. Transferability of AdvFace

As shown in the Table 2, we build three types of reconstruction networks that can be employed by the attacker to verify the Transferability of the method. In Figs. 4 5 6, we show the facial images reconstructed from the adversarial features under three different shadow models by three different reconstruction networks. We can see that the defense effectiveness of AdvFace is maintained under different shadow models when encountering different attack networks, which validates the transferability of the adversarial features generated by AdvFace.

## C. Details of Trade-off

We further show the quantitative values of trade-off in Tab. 1. We can see that when  $\epsilon$  increases from 0.00 to 0.20, the accuracy drops slightly, but the ability to against reconstruction attacks improves rapidly. Moreover, the accuracy drops faster from 0.25 to 0.30, while the ability to against reconstruction attacks is further improved. All of these results that AdvFace could provide a good trade-off between defending against reconstruction attacks and maintaining face recognition accuracy. Finally, we choose  $\epsilon$  to be 0.20 in the experiments.

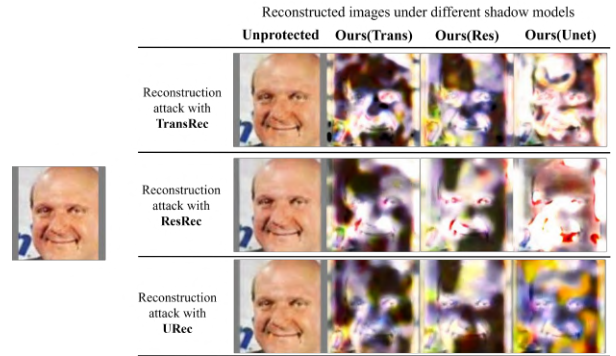

Figure 4. Transferability of AdvFace on defending against reconstruction attacks on dataset LFW.

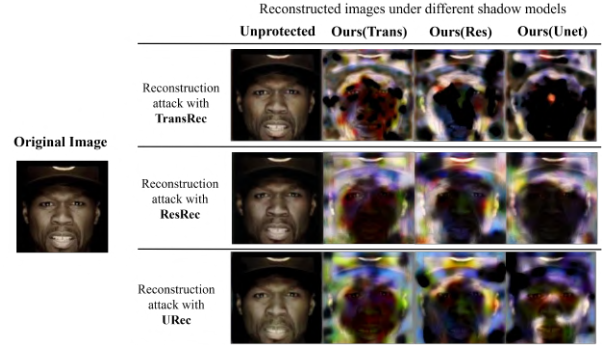

Figure 5. Transferability of AdvFace on defending against reconstruction attacks on dataset CFP-FP.

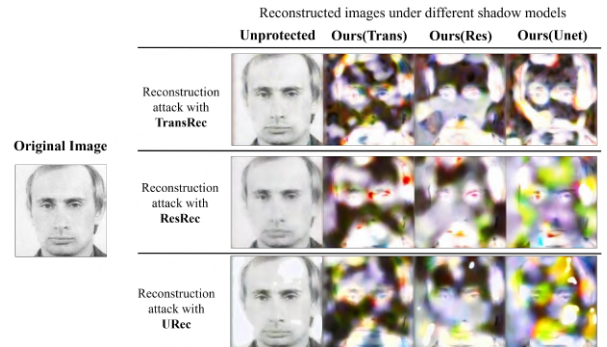

Figure 6. Transferability of AdvFace on defending against reconstruction attacks on dataset AgeDB-30.

216  
217  
218  
219  
220  
221  
222  
223  
224  
225  
226  
227  
228  
229  
230  
231  
232  
233  
234  
235  
236  
237  
238  
239  
240  
241  
242  
243  
244  
245  
246  
247  
248  
249  
250  
251  
252  
253  
254  
255  
256  
257  
258  
259  
260  
261  
262  
263  
264  
265  
266  
267  
268  
269

## References

- [1] Gary B Huang, Marwan Mattar, Tamara Berg, and Eric Learned-Miller. Labeled faces in the wild: A database for studying face recognition in unconstrained environments. In *Workshop on faces in 'Real-Life' Images: detection, alignment, and recognition*, 2008. 1
- [2] Stylianos Moschoglou, Athanasios Papaioannou, Christos Sagonas, Jiankang Deng, Irene Kotsia, and Stefanos Zafeiriou. Agedb: the first manually collected, in-the-wild age database. In *proceedings of the IEEE conference on computer vision and pattern recognition workshops*, pages 51–59, 2017. 1
- [3] Soumyadip Sengupta, Jun-Cheng Chen, Carlos Castillo, Vishal M Patel, Rama Chellappa, and David W Jacobs. Frontal to profile face verification in the wild. In *2016 IEEE winter conference on applications of computer vision (WACV)*, pages 1–9. IEEE, 2016. 1

270  
271  
272  
273  
274  
275  
276  
277  
278  
279  
280  
281  
282  
283  
284  
285  
286  
287  
288  
289  
290  
291  
292  
293  
294  
295  
296  
297  
298  
299  
300  
301  
302  
303  
304  
305  
306  
307  
308  
309  
310  
311  
312  
313  
314  
315  
316  
317  
318  
319  
320  
321  
322  
323
